# Supplementary material for: Medical Waste Incineration Fly Ash as a Mineral Filler in Dense Bituminous Course in Flexible Pavements
Source: MDPI journal article supplement (doi:10.3390/ma16165612), 2023-08-13
Supplement: s1 [file s1]

## Supplementary Information

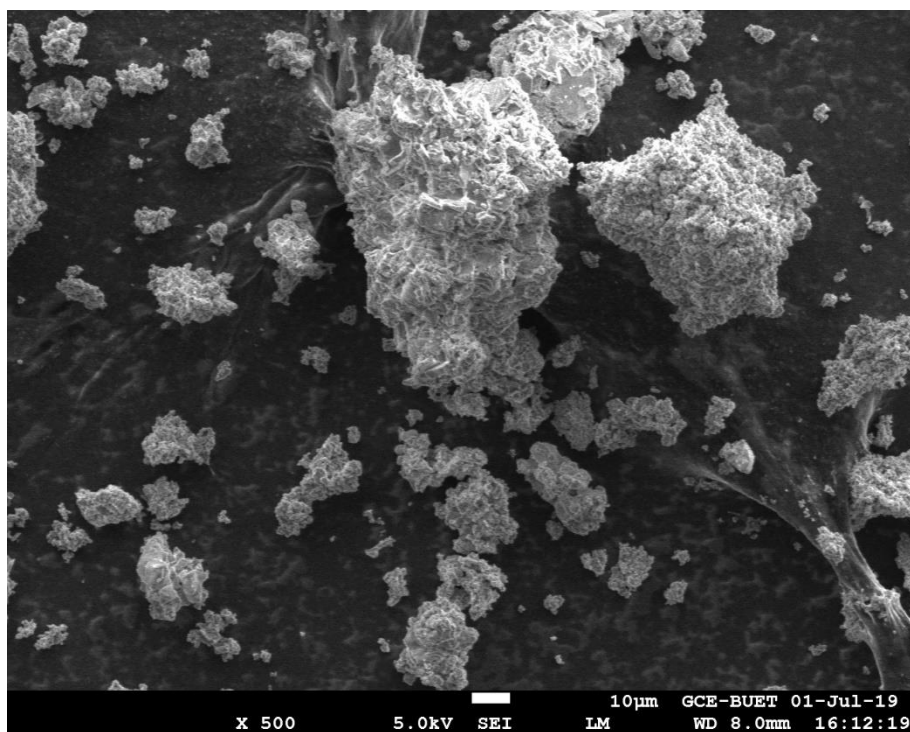

*Figure S-1: SEM image of MWIFA with 500x zoom.*

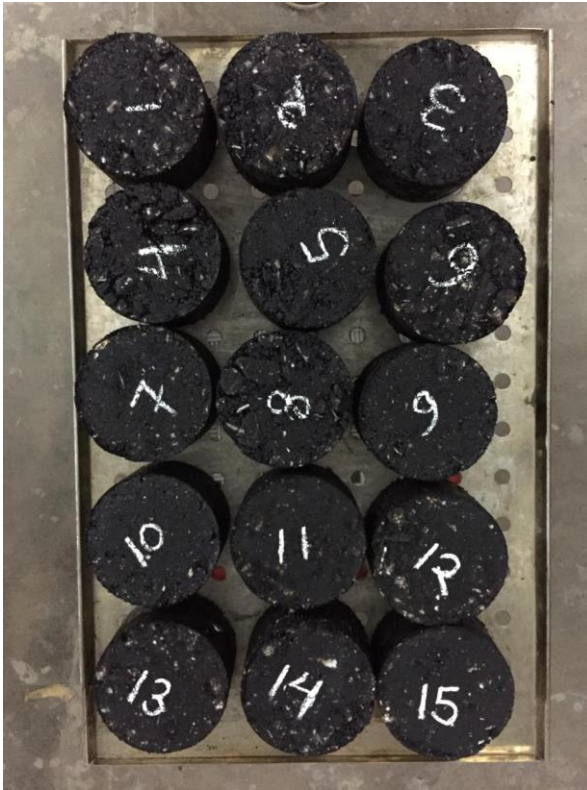

(a)

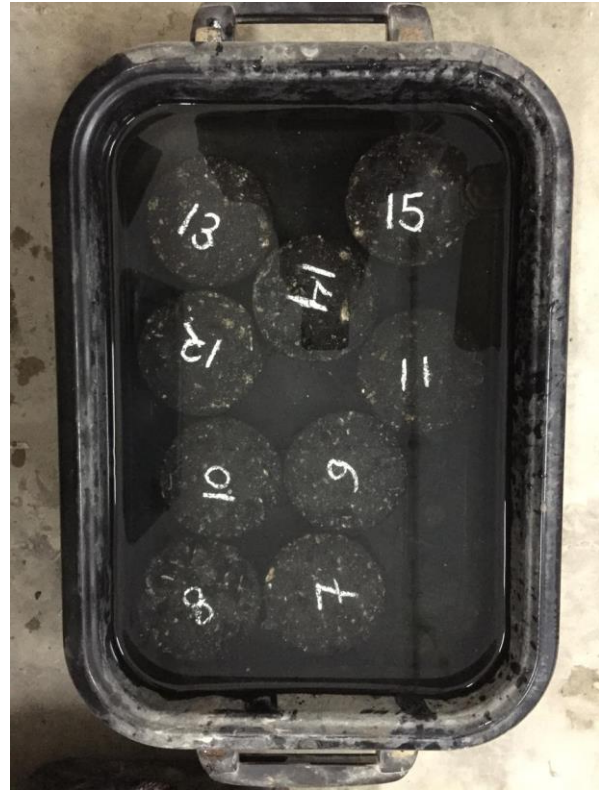

(b)

Figure S-2: Prepared samples: (a) after demolding and (b) during submerged for SSD weight calculation.

Table S-1: Mix proportions of the asphalt mixes for both fillers.

| Sieve Size         | 0% Filler | 2% Filler | 4% Filler | 6% Filler | 8% Filler | 10% Filler |
|--------------------|-----------|-----------|-----------|-----------|-----------|------------|
|                    | % Passing  |
| 1 inch (25 mm)     | 100       | 100       | 100       | 100       | 100       | 100        |
| 3/4 inch (19 mm)   | 95        | 95        | 95        | 95        | 95        | 95         |
| 3/8 inch (9.5 mm)  | 68        | 68        | 68        | 68        | 68        | 68         |
| No. 4 (4.75 mm)    | 50        | 50        | 50        | 50        | 50        | 50         |
| No. 8 (2.36 mm)    | 35        | 35        | 36        | 36        | 37        | 38         |
| No. 50 (0.3 mm)    | 9         | 10        | 12        | 13        | 15        | 17         |
| N0. 200 (0.075 mm) | 0         | 2         | 4         | 6         | 8         | 10         |
